# Impact of Canagliflozin on Kidney and Cardiovascular Outcomes by Type 2 Diabetes Duration: A Pooled Analysis of the CANVAS Program and CREDENCE Trials

Sheldon W. Tobe, Thomas A. Mavrakanas, Harpreet S. Bajaj, Adeera Levin, Navdeep Tangri, April Slee, Brendon L. Neuen, Vlado Perkovic, Kenneth W. Mahaffey, Wally Rapatttoni, and Fernando G. Ang

*Diabetes Care* 2024;47(3):501–507 | <https://doi.org/10.2337/dc23-1450>

## Impact of Canagliflozin on Kidney, Albuminuria and Cardiovascular outcomes by Type 2 Diabetes duration: Pooled analysis of the CANVAS Program and CREDENCE trials.

Sheldon W. Tobe, Thomas A. Mavrakanas, Harpreet S. Bajaj, Adeera Levin, Navdeep Tangri, April Slee, Brendon L. Neuen, Vlado Perkovic, Kenneth W. Mahaffey, Wally Rapatttoni, Fernando G. Ang

**Canagliflozin consistently confers cardiorenal benefits in patients regardless of type 2 diabetes duration.**

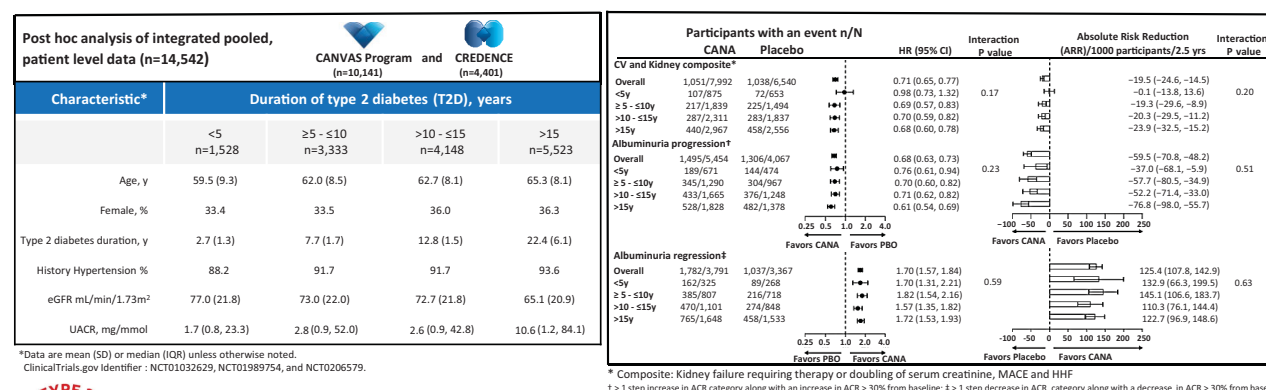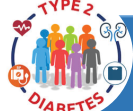

- Regardless of the duration of type 2 diabetes, canagliflozin demonstrated sustained reduction of CV and kidney outcomes. The total risk reduction was greater in individuals with higher cardiovascular and kidney risk.
- Within 5 years of type 2 diabetes diagnosis, canagliflozin positively impacted on albuminuria progression and regression, an important consideration in primary care

ACR, albumin-to-creatinine ratio; ARR, absolute risk reductions; CANVAS, Canagliflozin Cardiovascular Assessment Study; CREDENCE, Evaluation of the Effects of Canagliflozin on Renal and Cardiovascular Outcomes in Participants With Diabetic Nephropathy; CV, cardiovascular; eGFR, estimated glomerular filtration rate; HHF, hospitalization for heart failure; HR, hazard ratio; IQR, interquartile range; MACE, major adverse cardiovascular event; PBO, placebo; UACR, urinary albumin-to-creatinine ratio

## ARTICLE HIGHLIGHTS

### • Why did we undertake this study?

This pooled analysis of the Canagliflozin Cardiovascular Assessment Study (CANVAS) Program and Evaluation of the Effects of Canagliflozin on Renal and Cardiovascular Outcomes in Participants With Diabetic Nephropathy (CREDENCE) trials determined whether type 2 diabetes duration (by 5-year intervals) modified canagliflozin effects on cardiovascular and kidney outcomes, including progression and regression of albuminuria.

### • What is the specific question we wanted to answer?

This study assessed the effect of diabetes duration on the efficacy of the sodium–glucose cotransporter inhibitor canagliflozin.

### • What did we find?

Canagliflozin imparted benefits in participants with type 2 diabetes, across all time intervals, with no heterogeneity for cardiovascular or kidney events, including the progression and regression of albuminuria within the first 5 years of diabetes.

### • What are the implications of our findings?

Our findings demonstrated treating individuals with type 2 diabetes with canagliflozin confers consistent cardiorenal benefits for recent and long-standing diabetes duration.

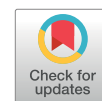

# Impact of Canagliflozin on Kidney and Cardiovascular Outcomes by Type 2 Diabetes Duration: A Pooled Analysis of the CANVAS Program and CREDENCE Trials

Diabetes Care 2024;47:501–507 | <https://doi.org/10.2337/dc23-1450>

Sheldon W. Tobe,<sup>1,2</sup>  
Thomas A. Mavrakanas,<sup>3</sup>  
Harpreet S. Bajaj,<sup>4</sup> Adeera Levin,<sup>5</sup>  
Navdeep Tangri,<sup>6,7</sup> April Slee,<sup>8</sup>  
Brendon L. Neuen,<sup>9,10</sup> Vlado Perkovic,<sup>9–11</sup>  
Kenneth W. Mahaffey,<sup>12</sup>  
Wally Rapaport,<sup>13</sup> and  
Fernando G. Ang<sup>13</sup>

## OBJECTIVE

The study was undertaken because it was unknown whether the duration of type 2 diabetes modifies the effects of sodium–glucose cotransporter 2 inhibitor canagliflozin on cardiovascular (CV) and kidney outcomes.

## RESEARCH DESIGN AND METHODS

This post hoc analysis of the Canagliflozin Cardiovascular Assessment Study (CANVAS) Program ( $N = 10,142$ ) and Evaluation of the Effects of Canagliflozin on Renal and Cardiovascular Outcomes in Participants With Diabetic Nephropathy (CREDENCE) trial ( $N = 4,401$ ) evaluated hazard ratios and 95% CIs using Cox proportional hazards for the effects of canagliflozin on CV and kidney outcomes, including progression and regression of albuminuria over 5-year intervals of disease duration.

## RESULTS

Canagliflozin had ranges of benefit across intervals of diabetes duration, with no heterogeneity for major adverse CV events, CV death or heart failure hospitalization, and kidney failure requiring therapy or doubling serum creatinine. Furthermore, canagliflozin reduced albuminuria progression and increased albuminuria regression with no interaction across all diabetes duration subgroups.

## CONCLUSIONS

Our findings suggest that earlier treatment with canagliflozin confers consistent cardiorenal benefits to individuals with type 2 diabetes.

Type 2 diabetes remains the most common reason for kidney replacement therapy requiring dialysis. There is persistent residual kidney risk from type 2 diabetes, even after achieving blood pressure control, including the use of renin angiotensin aldosterone system inhibitors (1). To address the benefit of sodium–glucose cotransporter inhibitor (SGLT2i) on cardiovascular (CV) and kidney outcomes, we conducted a post hoc analysis to assess the effects of canagliflozin versus placebo on

<sup>1</sup>Sunnybrook Research Institute, Toronto, Ontario, Canada

<sup>2</sup>Northern Ontario School of Medicine, Sudbury, Ontario, Canada

<sup>3</sup>Division of Nephrology, Department of Medicine, McGill University Health Centre and Research Institute, Montreal, Quebec, Canada

<sup>4</sup>LMC Healthcare, Brampton, Ontario, Canada

<sup>5</sup>Division of Nephrology, University of British Columbia, Vancouver, British Columbia, Canada

<sup>6</sup>Chronic Disease Innovation Centre, Seven Oaks General Hospital, Winnipeg, Manitoba, Canada

<sup>7</sup>Department of Internal Medicine, University of Manitoba, Winnipeg, Manitoba, Canada

<sup>8</sup>New Arch Consulting, Seattle, WA

<sup>9</sup>The George Institute for Global Health, University of New South Wales Sydney, Sydney, New South Wales, Australia

<sup>10</sup>Royal North Shore Hospital, Sydney, Australia

<sup>11</sup>Faculty of Medicine, University of New South Wales Sydney, Sydney, New South Wales, Australia

<sup>12</sup>Stanford Center for Clinical Research, Department of Medicine, Stanford University School of Medicine, Stanford, CA

<sup>13</sup>Janssen, Inc., Toronto, Ontario, Canada

Corresponding author: Sheldon W. Tobe, sheldon.tobe@sunnybrook.ca

Received 4 August 2023 and accepted 26 December 2023

Clinical trial reg. no. NCT01032629, NCT01989754, NCT02065791, [clinicaltrials.gov](https://clinicaltrials.gov)

© 2024 by the American Diabetes Association. Readers may use this article as long as the work is properly cited, the use is educational and not for profit, and the work is not altered. More information is available at <https://www.diabetesjournals.org/journals/pages/license>.

CV and kidney events in participants with type 2 diabetes and high CV risk and/or CKD, according to baseline duration of diabetes.

## RESEARCH DESIGN AND METHODS

### Study Design and Participants

This post hoc analysis is an integrated, pooled, patient-level data meta-analysis from the Canagliflozin Cardiovascular Assessment Study (CANVAS) Program and the Effects of Canagliflozin on Renal and Cardiovascular Outcomes in Participants With Diabetic Nephropathy (CREDENCE) trials. Both were randomized, double-blinded, placebo controlled, multicenter studies. The CANVAS Program ( $N = 10,142$ ) consisted of two multicenter, double-blind, placebo-controlled, randomized trials, CANVAS and Canagliflozin Cardiovascular Assessment Study–Renal (CANVAS-R). Eligible participants had type 2 diabetes ( $HbA_{1c}$  of 7.0–10.5% [53–91 mmol/mol]), an estimated glomerular filtration rate (eGFR)  $>30$  mL/min/1.73 m<sup>2</sup>, and were either aged  $\geq 30$  years with a history of symptomatic atherosclerotic CV disease or aged  $\geq 50$  years with at least two CV risk factors (2,3). The CREDENCE trial consisted of 4,401 participants with type 2 diabetes with  $HbA_{1c}$  of 6.5–12.0% (48–108 mmol/mol), eGFR of 30–89 mL/min/1.73 m<sup>2</sup>, and albuminuria of  $>300$  to  $\leq 5,000$  mg/g ( $>33.9$ –565.6 mg/mmol) (4). Participants in each study were randomized to receive canagliflozin or placebo (in addition to standard of care therapy). Although the study participants across the two treatment groups had similar characteristics, there were differences between the studies due to inclusion criteria. In CREDENCE, all participants at baseline had severely increased albuminuria. In the CANVAS Program, 18% of participants had abnormal urine albumin-to-creatinine ratio (ACR) at baseline and  $\sim 20\%$  had an eGFR  $<60$  mL/min/1.73 m<sup>2</sup>. With respect to CV risk profile, 66% of participants in the CANVAS Program had established CV disease compared with 50% in CREDENCE. Detailed study methods, statistical analysis plan, and reporting of the CANVAS Program and CREDENCE trials have been previously published (5,6). The CREDENCE and CANVAS Program studies were approved by ethics committees at each site and registered at Clinicaltrials.gov (CREDENCE study NCT02065791, CANVAS

Program studies NCT01032629 and NCT01989754).

### Outcomes and Analyses

This post hoc analysis was based on the intent-to-treat analysis set of the CANVAS Program ( $N = 10,142$ ) and CREDENCE trial ( $N = 4,401$ ), which included participants who were randomized to canagliflozin or placebo and had values for all selected outcomes (4,7). Categorical variables are represented as counts and percentage of cohort totals, and continuous variables are represented as mean and SD or median and interquartile range. The effects of canagliflozin versus placebo were examined for CV and kidney outcomes in study participants according to baseline duration of diabetes. Diabetes duration was divided into four time periods:  $<5$ ,  $\geq 5$  to  $\leq 10$ ,  $>10$  to  $\leq 15$ , and  $>15$  years. This analysis pooled patient-level data from the CANVAS Program and the CREDENCE trial to determine the effect of canagliflozin versus placebo on the following outcomes:

- CV events (major adverse CV event [MACE] and the composite of CV death or hospitalization for heart failure)
- CKD progression (doubling of serum creatinine)
- The composite of kidney and CV events (kidney failure requiring therapy or doubling of serum creatinine, MACE, and hospitalization for heart failure).
- Albuminuria progression and regression (change in albuminuria class plus a change in urine ACR by at least 30% from baseline). Albuminuria was defined as normo-, micro-, or macroalbuminuria, now known as normal (stage A1;  $<30$  mg/g [3.39 mg/mmol]), moderate (stage A2; 30–300 mg/g [3.39–33.9 mg/mmol]), and severe (stage A3;  $>300$  mg/g [33.9 mg/mmol]) (8).

Hazard ratios (HR) and 95% CI for each outcome were estimated separately using Cox regression models, by duration of diabetes group. Interaction  $P$  values were calculated in a single model for each outcome by including treatment group by diabetes duration interaction. Absolute risk reductions per 1,000 patients over 2.5 years were calculated. A Poisson model was used to estimate the event rates per 100 patient-years of albuminuria progression or regression to

compare the impact of canagliflozin on the risk of improved and worsening albuminuria.

A two-sided  $P < 0.05$  for the interaction term was deemed probable to reflect a difference beyond chance. While this is a post hoc combined analysis, the analyses of these outcomes were prespecified for each of the included trials, and the results should be interpreted in this context. Analyses were performed using SAS 9.4 software (SAS Institute, Cary, NC).

### Data and Resource Availability

The data sharing policy of Janssen Pharmaceutical Companies of Johnson & Johnson is available at <https://www.janssen.com/clinical-trials/transparency>. As noted on this site, requests for access to the study data can be submitted through the Yale Open Data Access (YODA) Project site at <https://yoda.yale.edu>.

## RESULTS

With increasing duration of diabetes, participants in these studies were older, less likely to have a history of heart failure, but more likely to have a lower eGFR and higher ACR (Table 1). There was no significant interaction between the duration of type 2 diabetes and the effect of canagliflozin on cardiovascular outcomes. The HR for MACE ranged from 1.08 to 0.77 in those with diabetes duration  $<5$  to  $>15$  years, and the absolute risk reduction ranged from 2.5 to  $-13.6$  per 1,000 patients over 2.5 years (number needed to treat [NNT] 73) (Fig. 1). The HR for the composite outcome of CV death or hospitalization for heart failure ranged from 0.75 to 0.80 in those with diabetes duration  $<5$  to  $>15$  years, and the absolute risk reduction ranged from  $-8.5$  to  $-7.2$  per 1,000 patients over 2.5 years. Similarly, the HR for the composite CV and kidney end point ranged from 0.98 to 0.68 in those with diabetes duration  $<5$  to  $>15$  years, and the absolute risk reduction ranged from  $-0.1$  to  $-23.9$  per 1,000 patients over 2.5 years.

There was no significant interaction between the duration of type 2 diabetes and the effect of canagliflozin on the doubling of serum creatinine, on the doubling of serum creatinine or kidney failure requiring therapy, or between the

Table 1—Baseline demographic and clinical characteristics of the pooled CANVAS Program and CRENDENCE trial

|                                                                     | <5 years          |                  |                      | ≥5 to ≤10 years     |                    |                      | >10 years to ≤15 years |                    |                      | >15 years           |                    |                      |
|---------------------------------------------------------------------|-------------------|------------------|----------------------|---------------------|--------------------|----------------------|------------------------|--------------------|----------------------|---------------------|--------------------|----------------------|
|                                                                     | CANA<br>(n = 875) | PBO<br>(n = 653) | Total<br>(N = 1,528) | CANA<br>(n = 1,839) | PBO<br>(n = 1,494) | Total<br>(N = 3,333) | CANA<br>(n = 2,311)    | PBO<br>(n = 1,837) | Total<br>(N = 4,148) | CANA<br>(n = 2,967) | PBO<br>(n = 2,556) | Total<br>(N = 5,523) |
| Age (years)                                                         | 59.4 ± 9.4        | 59.7 ± 9.2       | 59.7 ± 9.3           | 62.0 ± 8.5          | 61.9 ± 8.6         | 62.0 ± 8.5           | 62.6 ± 8.2             | 63.0 ± 7.9         | 62.7 ± 8.1           | 65.3 ± 8.0          | 65.4 ± 8.3         | 65.3 ± 8.1           |
| Sex                                                                 |                   |                  |                      |                     |                    |                      |                        |                    |                      |                     |                    |                      |
| Female                                                              | 277 (31.7)        | 233 (35.7)       | 510 (33.4)           | 611 (33.2)          | 506 (33.9)         | 1,117 (33.5)         | 828 (35.8)             | 664 (36.1)         | 1,492 (36.0)         | 1,080 (36.4)        | 924 (36.2)         | 2,004 (36.3)         |
| Male                                                                | 598 (68.3)        | 420 (64.3)       | 1,018 (66.6)         | 1,228 (66.8)        | 988 (66.1)         | 2,216 (66.5)         | 1,483 (64.2)           | 1,173 (63.9)       | 2,656 (64.0)         | 1,887 (63.6)        | 1,632 (63.8)       | 3,519 (63.7)         |
| Race                                                                |                   |                  |                      |                     |                    |                      |                        |                    |                      |                     |                    |                      |
| Asian                                                               | 152 (17.4)        | 94 (14.4)        | 246 (16.1)           | 283 (15.4)          | 210 (14.1)         | 493 (14.8)           | 335 (14.5)             | 253 (13.8)         | 588 (14.2)           | 432 (14.6)          | 401 (15.7)         | 833 (15.1)           |
| Black or African American                                           | 33 (3.8)          | 31 (4.7)         | 67 (4.2)             | 59 (3.2)            | 64 (4.3)           | 123 (3.7)            | 74 (3.2)               | 75 (4.1)           | 149 (3.6)            | 122 (4.1)           | 102 (4.0)          | 224 (4.1)            |
| Other*                                                              | 48 (5.5)          | 36 (5.5)         | 84 (5.5)             | 110 (6.0)           | 92 (6.2)           | 201 (6.1)            | 130 (5.6)              | 120 (6.5)          | 250 (6.0)            | 224 (7.5)           | 187 (7.3)          | 411 (7.4)            |
| White                                                               | 642 (73.4)        | 492 (75.3)       | 1,134 (74.2)         | 1,387 (75.4)        | 1,128 (75.5)       | 2,515 (75.5)         | 1,772 (76.7)           | 1,389 (75.6)       | 3,161 (76.2)         | 2,189 (73.8)        | 1,866 (73.0)       | 4,055 (73.4)         |
| Daily cigarette smoker                                              | 199 (22.7)        | 183 (21.1)       | 382 (22.1)           | 358 (19.5)          | 276 (18.5)         | 634 (19.0)           | 419 (18.2)             | 346 (18.8)         | 765 (18.4)           | 385 (13.0)          | 323 (12.6)         | 708 (12.8)           |
| History of hypertension                                             | 762 (88.1)        | 586 (90.7)       | 1,348 (89.2)         | 1,677 (92.2)        | 1,378 (93.2)       | 3,055 (92.7)         | 2,103 (91.8)           | 1,702 (93.4)       | 3,805 (92.5)         | 2,773 (94.2)        | 2,395 (94.9)       | 5,168 (94.5)         |
| History of heart failure                                            | 175 (24.2)        | 139 (26.8)       | 314 (25.3)           | 310 (21.8)          | 266 (24.3)         | 576 (22.9)           | 295 (15.6)             | 251 (17.8)         | 546 (16.5)           | 351 (16.9)          | 324 (19.8)         | 675 (18.2)           |
| Type 2 diabetes duration (years)                                    | 2.7 ± 1.3         | 2.7 ± 1.3        | 2.7 ± 1.3            | 7.7 ± 1.7           | 7.8 ± 1.7          | 7.7 ± 1.7            | 12.8 ± 1.5             | 12.8 ± 1.5         | 12.8 ± 1.5           | 22.3 ± 6.2          | 22.6 ± 6.1         | 22.4 ± 6.1           |
| Baseline insulin use                                                | 195 (22.3)        | 131 (20.1)       | 326 (21.3)           | 720 (39.2)          | 615 (41.2)         | 1,335 (40.1)         | 1,262 (54.6)           | 998 (54.3)         | 2,260 (54.5)         | 2,164 (72.9)        | 1,889 (73.9)       | 4,053 (73.4)         |
| History of CV disease                                               | 661 (75.5)        | 467 (71.5)       | 1,128 (73.8)         | 1,275 (69.3)        | 1,036 (69.3)       | 2,311 (69.3)         | 1,135 (49.1)           | 953 (51.9)         | 2,088 (50.3)         | 1,795 (60.5)        | 1,548 (60.6)       | 3,343 (60.5)         |
| History of amputation                                               | 14 (2.0)          | 3 (0.6)          | 17 (1.4)             | 37 (2.7)            | 30 (2.9)           | 67 (2.8)             | 69 (3.7)               | 46 (3.3)           | 115 (3.6)            | 135 (6.7)           | 138 (8.9)          | 273 (7.6)            |
| Any atherosclerotic disease (coronary, cerebrovascular, peripheral) | 675 (86.5)        | 483 (86.3)       | 1,158 (86.4)         | 1,331 (84.8)        | 1,078 (86.3)       | 2,409 (85.5)         | 1,295 (63.2)           | 1,081 (68.0)       | 2,376 (65.3)         | 1,935 (77.2)        | 1,657 (80.9)       | 3,592 (78.9)         |
| History-coronary vascular disease                                   | 514 (68.6)        | 354 (67.2)       | 868 (68.0)           | 1,004 (67.8)        | 812 (69.8)         | 1,816 (68.7)         | 951 (48.9)             | 784 (52.4)         | 1,735 (50.5)         | 1,414 (62.3)        | 1,194 (65.8)       | 2,608 (63.8)         |
| History-peripheral vascular disease                                 | 191 (26.0)        | 129 (24.7)       | 320 (25.5)           | 370 (25.9)          | 319 (28.8)         | 689 (27.2)           | 417 (21.6)             | 349 (23.9)         | 766 (22.6)           | 728 (32.7)          | 653 (37.0)         | 1,381 (34.6)         |
| History-cerebrovascular disease                                     | 185 (25.8)        | 127 (24.9)       | 312 (25.4)           | 381 (26.9)          | 288 (26.5)         | 669 (26.7)           | 359 (19.0)             | 320 (22.2)         | 679 (20.4)           | 530 (25.2)          | 468 (28.2)         | 998 (26.5)           |
| History-coronary revascularization                                  | 286 (39.9)        | 196 (38.9)       | 482 (39.5)           | 576 (41.2)          | 472 (44.2)         | 1,048 (42.5)         | 537 (28.8)             | 457 (32.0)         | 994 (30.2)           | 890 (42.3)          | 731 (44.7)         | 1,621 (43.4)         |
| History-carotid revascularization                                   | 1 (0.1)           | 0 (0.0)          | 1 (0.1)              | 10 (0.7)            | 9 (0.9)            | 19 (0.8)             | 9 (0.5)                | 12 (0.9)           | 21 (0.7)             | 15 (0.8)            | 19 (1.3)           | 34 (1.0)             |
| History-peripheral revascularization                                | 34 (4.8)          | 19 (3.9)         | 53 (4.4)             | 85 (6.3)            | 65 (6.4)           | 150 (6.3)            | 73 (4.0)               | 70 (5.1)           | 143 (4.5)            | 135 (6.9)           | 161 (10.6)         | 296 (8.5)            |
| BMI (kg/m <sup>2</sup> )                                            | 31.7 ± 6.0        | 32.2 ± 6.2       | 31.9 ± 6.1           | 31.9 ± 6.0          | 31.6 ± 5.9         | 31.7 ± 6.0           | 32.0 ± 6.0             | 32.0 ± 6.0         | 32.0 ± 6.0           | 31.6 ± 5.9          | 31.5 ± 6.1         | 31.5 ± 6.0           |

Continued on p. 504

Table 1—Continued

|                                    | <5 years          |                  |                      | ≥5 to ≤10 years     |                    |                      | >10 years to ≤15 years |                    |                      | >15 years           |                    |                      |
|------------------------------------|-------------------|------------------|----------------------|---------------------|--------------------|----------------------|------------------------|--------------------|----------------------|---------------------|--------------------|----------------------|
|                                    | CANA<br>(n = 875) | PBO<br>(n = 653) | Total<br>(N = 1,528) | CANA<br>(n = 1,839) | PBO<br>(n = 1,494) | Total<br>(N = 3,333) | CANA<br>(n = 2,311)    | PBO<br>(n = 1,837) | Total<br>(N = 4,148) | CANA<br>(n = 2,967) | PBO<br>(n = 2,556) | Total<br>(N = 5,523) |
| SBP (mmHg)                         | 134.7 ± 15.1      | 135.7 ± 15.3     | 135.1 ± 15.2         | 136.2 ± 15.7        | 136.8 ± 15.3       | 136.5 ± 15.5         | 137.3 ± 15.4           | 138.6 ± 15.3       | 137.9 ± 15.3         | 138.9 ± 16.2        | 138.9 ± 16.4       | 138.9 ± 16.3         |
| DBP (mmHg)                         | 80.2 ± 9.3        | 80.7 ± 9.2       | 80.4 ± 9.2           | 78.9 ± 9.4          | 79.2 ± 9.5         | 79.0 ± 9.4           | 78.5 ± 9.3             | 78.6 ± 9.4         | 78.5 ± 9.4           | 75.9 ± 9.6          | 76.2 ± 9.6         | 76.0 ± 9.6           |
| Hemoglobin A <sub>1c</sub> (%)     | 8.1 ± 1.0         | 8.1 ± 1.1        | 8.1 ± 1.1            | 8.2 ± 1.1           | 8.3 ± 1.1          | 8.2 ± 1.1            | 8.3 ± 1.0              | 8.3 ± 1.0          | 8.3 ± 1.0            | 8.3 ± 1.0           | 8.3 ± 1.1          | 8.3 ± 1.1            |
| eGFR (mL/min/1.73 m <sup>2</sup> ) | 77.6 ± 21.8       | 76.3 ± 21.7      | 77.0 ± 21.8          | 73.4 ± 21.4         | 72.4 ± 22.8        | 73.0 ± 22.0          | 73.6 ± 22.0            | 71.6 ± 21.6        | 72.7 ± 21.8          | 65.8 ± 20.5         | 64.4 ± 21.3        | 65.1 ± 20.9          |
| eGFR group                         |                   |                  |                      |                     |                    |                      |                        |                    |                      |                     |                    |                      |
| <60 mL/min/1.73 m <sup>2</sup>     | 168 (19.2)        | 149 (22.9)       | 317 (20.8)           | 477 (26.0)          | 451 (30.2)         | 928 (27.9)           | 586 (25.4)             | 544 (29.6)         | 1,130 (27.2)         | 1,185 (39.9)        | 1,107 (43.3)       | 2,292 (41.5)         |
| ≥60 mL/min/1.73 m <sup>2</sup>     | 707 (80.8)        | 503 (77.1)       | 1,210 (79.2)         | 1,361 (74.0)        | 1,043 (69.8)       | 2,404 (72.1)         | 1,724 (74.6)           | 1,293 (70.4)       | 3,017 (72.8)         | 1,782 (60.1)        | 1,449 (57.7)       | 3,231 (58.5)         |
| ACR (mg/mmol)                      | 1.6 (0.8, 17.8)   | 1.8 (0.8, 29.7)  | 1.7 (0.8, 23.3)      | 2.3 (0.9, 44.0)     | 3.4 (0.9, 68.1)    | 2.8 (0.9, 52.0)      | 2.4 (0.9, 35.0)        | 2.9 (0.9, 50.4)    | 2.6 (0.9, 42.8)      | 7.5 (1.2, 71.9)     | 18.2 (1.3, 96.7)   | 10.6 (1.2, 84.1)     |
| ACR groups                         |                   |                  |                      |                     |                    |                      |                        |                    |                      |                     |                    |                      |
| 30 mg/g (3.4 mg/mmol)              | 531 (78.6)        | 366 (76.1)       | 897 (76.5)           | 989 (74.7)          | 732 (73.8)         | 1,721 (74.3)         | 1,256 (69.9)           | 950 (70.6)         | 2,206 (70.2)         | 1,231 (64.0)        | 945 (64.4)         | 2,176 (64.2)         |
| ≥30 mg/g (3.4 mg/mmol)             | 160 (23.2)        | 115 (23.9)       | 275 (23.5)           | 335 (25.3)          | 260 (26.2)         | 595 (25.7)           | 541 (30.1)             | 396 (29.4)         | 937 (29.8)           | 692 (36.0)          | 523 (35.6)         | 1,215 (35.8)         |
| Study                              |                   |                  |                      |                     |                    |                      |                        |                    |                      |                     |                    |                      |
| 28431754DIA3008                    | 345 (39.4)        | 170 (26.0)       | 515 (33.7)           | 641 (34.9)          | 336 (22.5)         | 977 (29.3)           | 908 (39.3)             | 497 (27.1)         | 1,405 (33.9)         | 994 (33.5)          | 439 (17.2)         | 1,433 (25.9)         |
| 28431754DIA4003                    | 349 (39.9)        | 319 (48.9)       | 668 (43.7)           | 698 (38.0)          | 672 (45.0)         | 1,370 (41.1)         | 908 (39.3)             | 863 (47.0)         | 1,771 (42.7)         | 947 (31.9)          | 1,045 (40.9)       | 1,992 (36.1)         |
| 28431754DNE3001                    | 81 (20.7)         | 164 (25.1)       | 345 (22.6)           | 500 (27.2)          | 386 (32.5)         | 986 (29.6)           | 495 (21.4)             | 477 (26.0)         | 972 (23.4)           | 1,026 (34.6)        | 1,072 (41.9)       | 2,098 (38.0)         |

Data are presented as mean ± SD, n (%), or median (interquartile range). DBP, diastolic blood pressure; PBO, placebo; SBP, systolic blood pressure. \*Includes American Indian, Alaska Native, Native Hawaiian, Pacific Islander, multiple, other, and unknown.

duration of type 2 diabetes and the effect of canagliflozin on albuminuria (Fig. 1). Within the diabetes duration subgroups, for the albuminuria end points of progression and regression, canagliflozin reduced the incidence of progression, and increased the incidence of regression, across each subgroup of diabetes duration, including participants with type 2 diabetes of <5 years. In study participants with type 2 diabetes duration of <5 years, the incidence of albuminuria progression was reduced with canagliflozin compared with placebo (HR 0.76, 95% CI 0.61–0.94; absolute risk reductions for diabetes duration <5 years 37.0 per 1,000 patients over 2.5 years) and for duration >15 years (76.8 per 1,000 patients over 2.5 years; NNT 27 and 13, respectively) (Fig. 1). Similarly, albuminuria regression was more frequently observed with canagliflozin than placebo in participants with diabetes duration <5 years (HR 1.70; 95% CI 1.31–2.21; absolute risk improvement for diabetes duration <5 years 132.9 per 1,000 patients over 2.5 years, NNT 8).

### Safety Outcomes

The incidence of any serious adverse event was significantly lower with canagliflozin compared with placebo in study participants with type 2 diabetes of any duration years (*P* for interaction = 0.74) (Table 2).

### CONCLUSIONS

In this post hoc analysis of participants with type 2 diabetes and high CV risk or moderate to severe albuminuria, canagliflozin reduced the incidence of CV and kidney events consistently, regardless of diabetes duration. Importantly, canagliflozin reduced the incidence of albuminuria progression and increased albuminuria regression, regardless of diabetes duration, including within the first 5 years from the diagnosis of type 2 diabetes.

This analysis highlights the clinical importance of reducing kidney and CV outcomes even for people with diabetes of short duration. These findings suggest that clinicians should not wait for rising albuminuria or declining kidney function to initiate SGLT2i therapy, but rather consider earlier intervention in people at highest risk of developing CKD or CV events. This can be assessed by risk



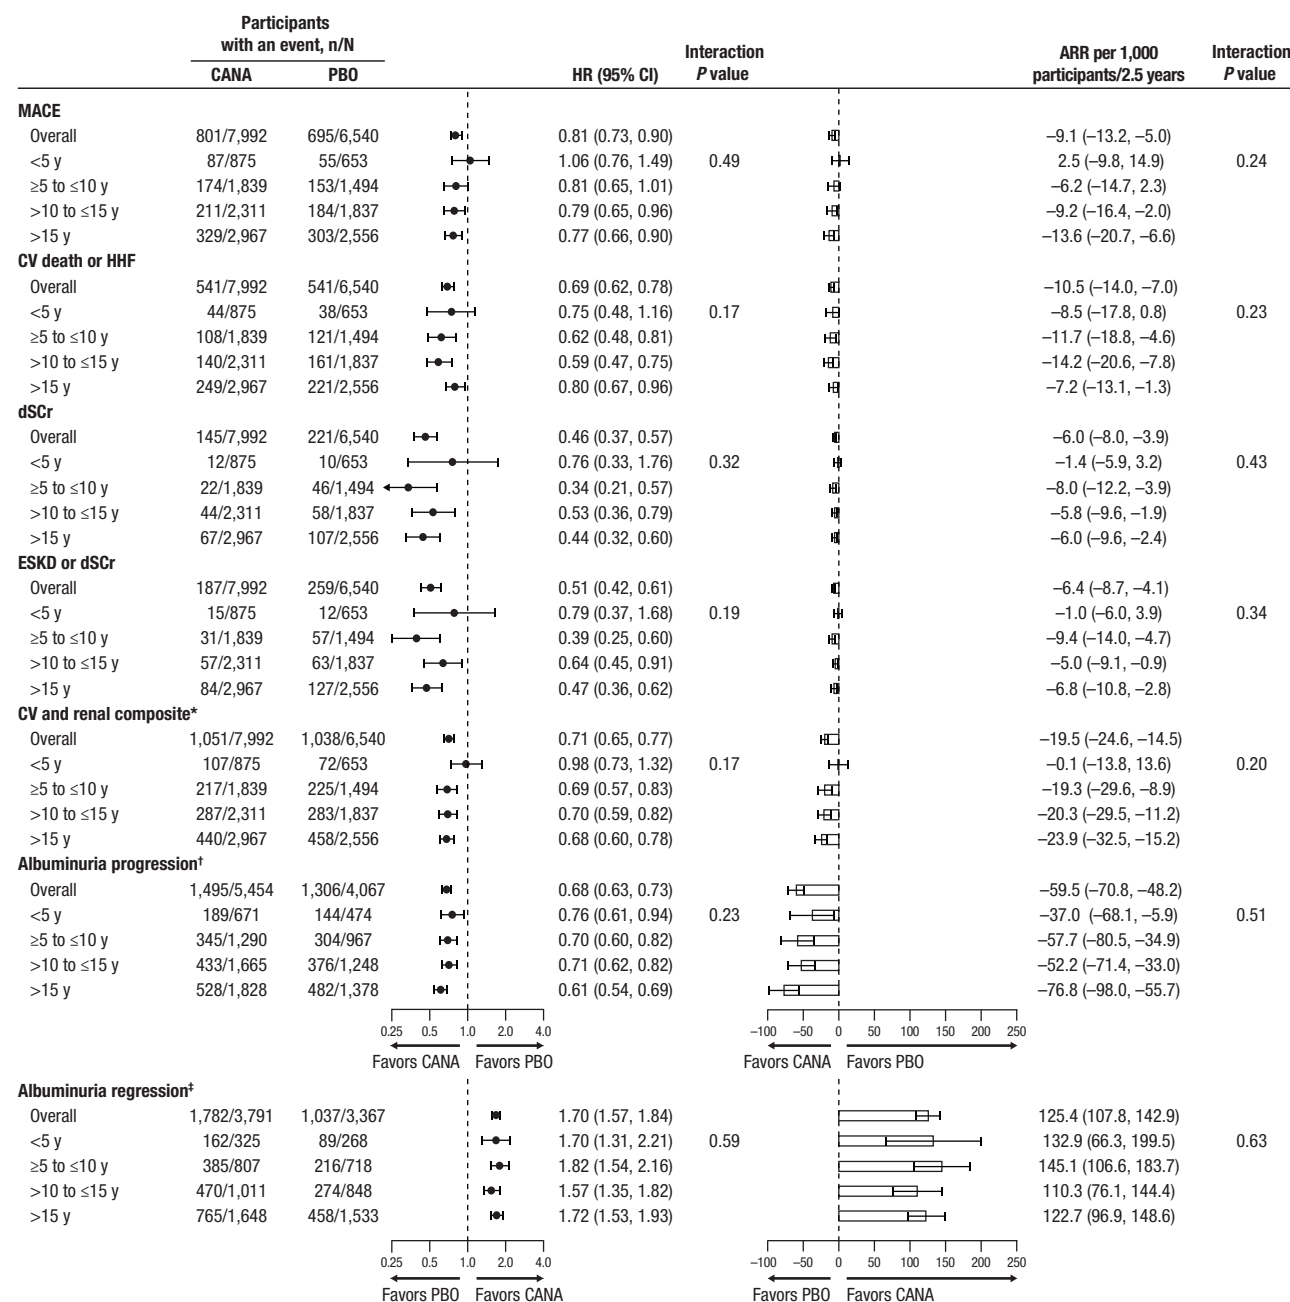

**Figure 1**—Effects of canagliflozin (CANA) on CV and kidney outcomes by type 2 diabetes duration. ARR, absolute risk reductions; ESKD, end-stage kidney disease; PBO, placebo. \*Composite that includes MACE, hospitalization for heart failure (HHF), doubling of serum creatinine (dSCr), or kidney failure requiring therapy (KRT). †One-step or more increase in ACR category along with an increase in ACR  $\geq 30\%$  from baseline. ‡One-step or more decrease in ACR category along with a decrease in ACR  $\geq 30\%$  from baseline.

calculators (9). Indeed, SGLT2 inhibition reduces CV, kidney, and mortality outcomes irrespective of metformin use (10). The European Society of Cardiology now has SGLT2i above metformin in the treatment algorithm for drug-naïve patients with type 2 diabetes at high CV risk (11).

This analysis has several limitations. It is a post hoc analysis of three randomized controlled trials. As an exploratory analysis, it was not designed with adequate

statistical power to evaluate outcomes in subgroups stratified by diabetes duration. Further, the trials included moderate- to high-risk CV disease and CKD populations; hence, the findings may not be generalizable to populations with low- to moderate-risk type 2 diabetes. However, the large sample size, the inclusion of participants with different baseline CV risk, and different stages of diabetic kidney disease constitutes important strengths of our analysis.

In this analysis, earlier treatment with canagliflozin prevented albuminuria progression and promoted albuminuria regression. Canagliflozin demonstrated CV and kidney benefits, including a reduction in CKD progression regardless of diabetes duration. These findings may assist clinicians treating individuals with type 2 diabetes through shared clinical decision making to manage their disease more effectively. Treatment with canagliflozin confers meaningful and consistent

Table 2—Incidence of any serious adverse events and any kidney-related serious adverse events\*

| Adverse events                          | Type 2 diabetes <5 years |                   |                |                   | Type 2 diabetes 5–10 years |                   |                  |                   | Type 2 diabetes >10–15 years |                   |                  |                   | Type 2 diabetes >15 years |                   |                  |                   |
|-----------------------------------------|--------------------------|-------------------|----------------|-------------------|----------------------------|-------------------|------------------|-------------------|------------------------------|-------------------|------------------|-------------------|---------------------------|-------------------|------------------|-------------------|
|                                         | CANVA                    |                   | PBO            |                   | CANVA                      |                   | PBO              |                   | CANVA                        |                   | PBO              |                   | CANVA                     |                   | PBO              |                   |
|                                         | n                        | (95% CI)          | n              | (95% CI)          | n                          | (95% CI)          | n                | (95% CI)          | n                            | (95% CI)          | n                | (95% CI)          | n                         | (95% CI)          | n                | (95% CI)          |
| Any SAE (% of subjects)                 | 242/875 (27.7)           | 1.03 (0.85, 1.26) | 166/651 (25.5) | 0.76 (0.58, 1.03) | 472/1,493 (31.6)           | 0.85 (0.75, 0.97) | 558/1,838 (30.4) | 0.76 (0.58, 1.03) | 712/2,308 (30.8)             | 0.01 (0.01, 0.01) | 599/1,837 (32.6) | 0.85 (0.76, 0.95) | 1,144/2,964 (38.6)        | 0.01 (0.01, 0.01) | 923/2,554 (36.1) | 0.08 (0.59, 1.07) |
| Any kidney-related SAE† (% of subjects) | 6/875 (0.7)              | 0.89 (0.27, 2.97) | 5/651 (0.8)    | 0.85 (0.27, 2.97) | 22/1,493 (1.5)             | 0.88 (0.49, 0.57) | 24/1,838 (1.3)   | 0.85 (0.49, 0.57) | 23/2,308 (1.0)               | 0.66 (0.36, 1.05) | 31/1,837 (1.7)   | 0.61 (0.36, 1.05) | 54/2,964 (1.8)            | 0.08 (0.08, 0.08) | 61/2,554 (2.4)   | 0.74 (0.09, 1.06) |

CANVA, canagliflozin; PBO, placebo; SAE, serious adverse event. \*Based on the safety population (all trial participants who received the study drug). †Kidney-related SAEs based on the Medical Dictionary for Regulatory Activities (MedDRA) terminology, included kidney events (among which are AKI, blood creatinine increase, eGFR decrease, dialysis, renal impairment) and were defined as life-threatening or led to unplanned hospitalization, prolonged hospitalization, or death (12).

cardiorenal benefits to individuals living with type 2 diabetes regardless of the duration of diabetes.

**Acknowledgments.** Figure preparation support was provided by Kim Caldwell, PhD, of Lumanity Communications Inc. Canagliflozin was developed by Janssen Research & Development, LLC, in collaboration with Mitsubishi Tanabe Pharma Corporation. The CANVAS Program and CREDENCE trial were supported by Janssen Research & Development, LLC.

**Funding and Duality of Interest.** This work was funded by Janssen Canada Inc. S.W.T. has received a KMH Clinic unrestricted grant and in-kind support for the Zero to Five study paid to Sunnybrook Research Institute, has received consulting fees from AstraZeneca paid to Sunnybrook Research Institute, has received payment or honoraria for lectures from Amgen, AstraZeneca, Bayer, Boehringer Ingelheim, Bristol-Myers Squibb, Eli Lilly and Company, Janssen, Novartis, Novo Nordisk, Pfizer, and Sanofi paid to the CHEP Plus education program, and has served as a volunteer for the American Hypertension Specialist Certification Program. T.A.M. is supported by an FRQS Junior 1 Clinician Scholar Award and received speaker honoraria from Daiichi Sankyo, BMS Canada, Janssen, AstraZeneca, and Pfizer, has served on advisory boards for Boehringer Ingelheim, Bayer, GSK, and Servier outside the submitted work, and has also received an unrestricted research grant from AstraZeneca. H.S.B. reports research support paid to his institution by Amgen, AstraZeneca, Boehringer Ingelheim, Cepro, Eli Lilly and Company, Gilead, Janssen, Kowa Pharmaceuticals Co. Ltd., Madrigal Pharmaceuticals, Merck, Novartis, Novo Nordisk, Pfizer, Sanofi, and Tricida. A.L. received research funding from Canadian Institutes of Health Research and the Kidney Foundation of Canada, served as a scientific advisor to Boehringer Ingelheim, AstraZeneca, National Institute of Diabetes and Digestive and Kidney Diseases, OccuRx, and Chinook Therapeutics, served on a data safety monitoring board or scientific committee for National Institute of Diabetes and Digestive and Kidney Diseases, National Institutes of Health, Kidney Precision Medicine, CURE consortium, and the University of Washington Kidney Research Institute Scientific Advisory Committee, GSK, AstraZeneca, and Boehringer Ingelheim, and received fees for time as CREDENCE national coordinator from Janssen, directed to her academic team. N.T. has received research support from the National Kidney Foundation, received consulting fees and research support from AstraZeneca, GSK, Boehringer Ingelheim, Bayer, Roche, Otsuka, Janssen, and ProKidney, and has equity in ClinPredict, Klinrisk, ProKidney, Marizyme, and Quanta. A.S. is an employee of New Arch Consulting and received funding from Janssen for this analysis. B.L.N. received fees for travel support, advisory boards, scientific presentations, and steering committee roles from AstraZeneca, Bayer, Boehringer Ingelheim, Cambridge Healthcare Research, and Janssen, with all honoraria paid to his institution. V.P. received fees for an advisory board, steering committee, or scientific presentation from AbbVie, Amgen, Astellas, AstraZeneca, Bayer, Boehringer Ingelheim,

Chinook Therapeutics, CSL Vifor, Gilead, GlaxoSmithKline, Janssen, MedImmune, Mitsubishi-Tanabe, Mundipharma, Novartis, Novo Nordisk, Otsuka, and Traveo Therapeutics, Inc., received speaker fees from Janssen, served on a data and safety monitoring committee for Dimerix, served on the board of directors for George Clinical, Garvan Institute, George Institute, Victor Chang Cardiac Research Institute, Ingham Institute, and Mindgardens Neuroscience Network, and has stock in George Clinical. K.W.M. has received research grants or contracts that support his research projects from the following companies: AHA, Apple, Inc, Bayer, California Institute Regenerative Medicine, Eidos, Ferring, Gilead, Google (Verily), Idorsia, Johnson & Johnson, Luitpold, Novartis, PAC-12, Precordior, Sanifit. K.W.M. provided consulting or other services (including CME) for the following companies (personal income): Amgen, Applied Therapeutics, Bayer, BMS, BridgeBio, CSL Behring, Elsevier, Fibrogen, Fosun Pharma, Johnson & Johnson, Lexicon, Moderna, Myokardia, Novartis, Novo Nordisk, Otsuka, Phasebio, Portola, Quidel, Sanofi, Theravance. K.W.M. has equity in the following companies: Precordior, Regencor. F.G.A. and W.R. are employees of Janssen. No other potential conflicts of interest relevant to this article were reported.

**Author Contributions.** S.W.T. and T.A.M. drafted the manuscript. S.W.T., T.A.M., H.S.B., A.L., N.T., B.L.N., V.P., K.W.M., W.R., and F.G.A. contributed to the study design and data interpretation. A.S. performed the statistical analysis. All authors critically revised and approved the final version of the manuscript. F.G.A. is the guarantor of this work and, as such, had full access to all the data in the study and take responsibility for the integrity of the data and the accuracy of the data analysis.

**Prior Presentation.** Parts of this study were presented in abstract and poster form at the American Society of Nephrology 55th Annual Meeting & Scientific Exposition, Orlando, FL 2–6 November 2022.

## References

- Johansen KL, Chertow GM, Foley RN, et al. US Renal Data System 2020 Annual Data Report: epidemiology of kidney disease in the United States. *Am J Kidney Dis* 2021;77(Suppl. 1): A7–A8
- Neal B, Perkovic V, Mahaffey KW, et al.; CANVAS Program collaborative group. Optimizing the analysis strategy for the CANVAS Program: a prespecified plan for the integrated analyses of the CANVAS and CANVAS-R trials. *Diabetes Obes Metab* 2017;19:926–935
- Perkovic V, de Zeeuw D, Mahaffey KW, et al. Canagliflozin and renal outcomes in type 2 diabetes: results from the CANVAS Program randomised clinical trials. *Lancet Diabetes Endocrinol* 2018;6:691–704
- Perkovic V, Jardine MJ, Neal B, et al.; CREDENCE Trial Investigators. Canagliflozin and renal outcomes in type 2 diabetes and nephropathy. *N Engl J Med* 2019;380:2295–2306
- Neal B, Perkovic V, Matthews DR, et al.; CANVAS-R Trial Collaborative Group. Rationale, design and baseline characteristics of the CAN agliflozin cardioVascular Assessment Study-Renal

(CANVAS-R): a randomized, placebo-controlled trial. *Diabetes Obes Metab* 2017;19:387–393

6. Jardine MJ, Mahaffey KW, Neal B, et al.; CREDENCE study investigators. The Canagliflozin and Renal Endpoints in Diabetes with Established Nephropathy Clinical Evaluation (CREDENCE) study rationale, design, and baseline characteristics. *Am J Nephrol* 2017;46:462–472

7. Neal B, Perkovic V, Mahaffey KW, et al.; CANVAS Program Collaborative Group. Canagliflozin and cardiovascular and renal events in type 2 diabetes. *N Engl J Med* 2017;377:644–657

8. Kidney Disease: Improving Global Outcomes (KDIGO) Blood Pressure Work Group. KDIGO 2021 Clinical Practice Guideline for the Management of Blood Pressure in Chronic Kidney Disease. *Kidney Int* 2021;99(Suppl.):S1–S87

9. Samuels J, Connelly K, Tangri N. Risk Prediction in Chronic Kidney Disease. In *Evidence-Based Nephrology*, Vol 1, 2nd ed. Craig JC, Molony DA, Strippoli GFM, Eds. New York, John Wiley & Sons, 2022, pp. 60–71

10. Neuen BL, Arnott C, Perkovic V, et al. Sodium-glucose co-transporter-2 inhibitors

with and without metformin: a meta-analysis of cardiovascular, kidney and mortality outcomes. *Diabetes Obes Metab* 2021;23:382–390

11. Cosentino F, Grant PJ, Aboyans V, et al.; ESC Scientific Document Group. 2019 ESC Guidelines on diabetes, pre-diabetes, and cardiovascular diseases developed in collaboration with the EASD. *Eur Heart J* 2020;41:255–323

12. Brown EG, Wood L, Wood S. The Medical Dictionary for Regulatory Activities (MedDRA). *Drug Saf* 1999;20:109–117
